# Supplementary material for: Arabidopsis Cys2/His2 Zinc Finger Transcription Factor ZAT18 Modulates the Plant Growth-Defense Tradeoff
Source: MDPI journal article supplement (doi:10.3390/ijms232315436), 2022-12-06
Supplement: s1 [file s1]

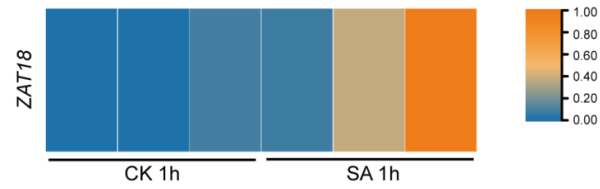

**Figure S1.** The relative expression levels of *ZAT18* in RNA-sequencing data. Two-week-old WT seedlings were treated with sterile dH<sub>2</sub>O (CK) or 1 mM SA for 1 hour, and samples were collected for RNA extraction and sequencing. The expression levels of *ZAT18* in different samples based on FPKM are shown (blue bar indicates lower expression level while orange bar indicates higher expression level). FPKM: fragments per kilobase of exon model per million reads mapped. Each vertical section represents an individual sample and there are three biological repetitions for both CK and SA treatment.

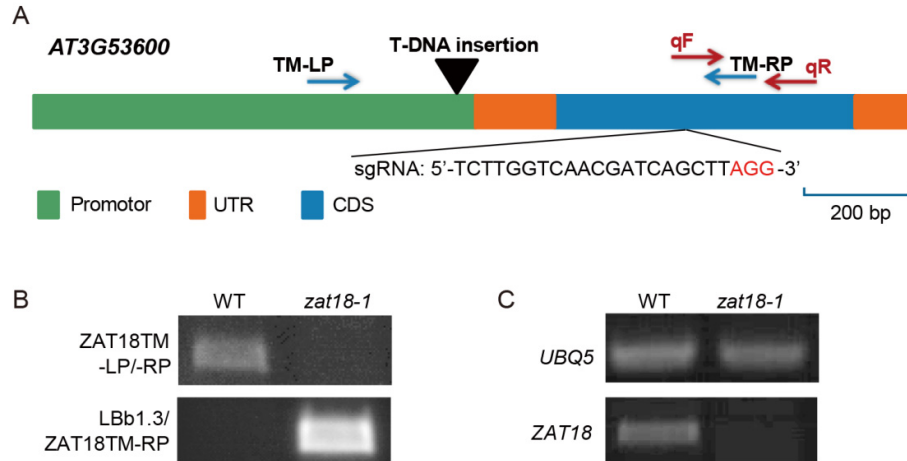

**Figure S2.** Identification of the T-DNA insertion mutant of *ZAT18*. **(A)** Gene structure of *ZAT18* is represented by promoter (green bar), untranslated regions (orange bars) and coding sequence (blue bar). The T-DNA insertion site and locations of primers for genotyping and qRT-PCR are indicated. The sgRNA target site for creating *zat18cr* is also indicated, and the PAM sequence is highlighted in red. **(B)** DNA was extracted from three-week-old WT and *zat18-1* mutant plants. PCR was performed with the ZAT18TM-LP/-RP and LBb1.3/ZAT18TM-RP sets of primers. **(C)** RNA was extracted from two-week-old WT and *zat18-1* mutant seedlings, and qRT-PCR was performed with *ZAT18*-specific primers (ZAT18-qF/qR) using *UBQ5* as loading controls.

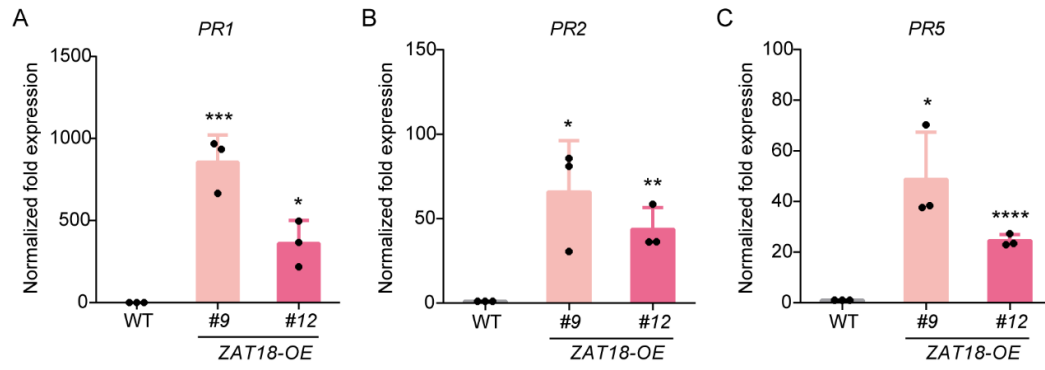

**Figure S3.** The expression levels of *PR* genes in *ZAT18-OE* lines. Two-week-old WT and *ZAT18-OE* seedlings without any treatment were collected for RNA extraction and qRT-PCR on *PR1* (A), *PR2* (B) and *PR5* (C). The expression levels of *UBQ5* served as references. Significant differences were detected by Student's *t* test. Data are shown as mean  $\pm$  s.d. ( $n = 3$ ,  $n$  indicates biological replicates). \*  $p < 0.05$ ; \*\*  $p < 0.01$ ; \*\*\*  $p < 0.001$ ; \*\*\*\*  $p < 0.0001$ .

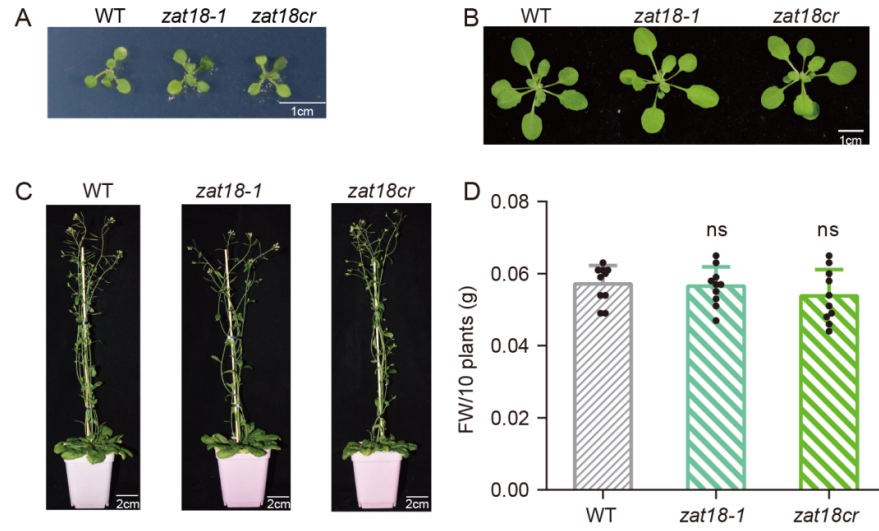

**Figure S4.** Abolishing the function of *ZAT18* has no obvious effects on plant growth. Representative plants of ten-day-old (A), three-week-old (B) and eight-week-old (C) WT and *zat18* mutants. (D) Seedlings of ten-day-old WT and *zat18* mutants were collected and weighed. Data are shown as mean  $\pm$  s.d. ( $n = 10$ ,  $n$  indicates biological replicates). ns, no significant difference.

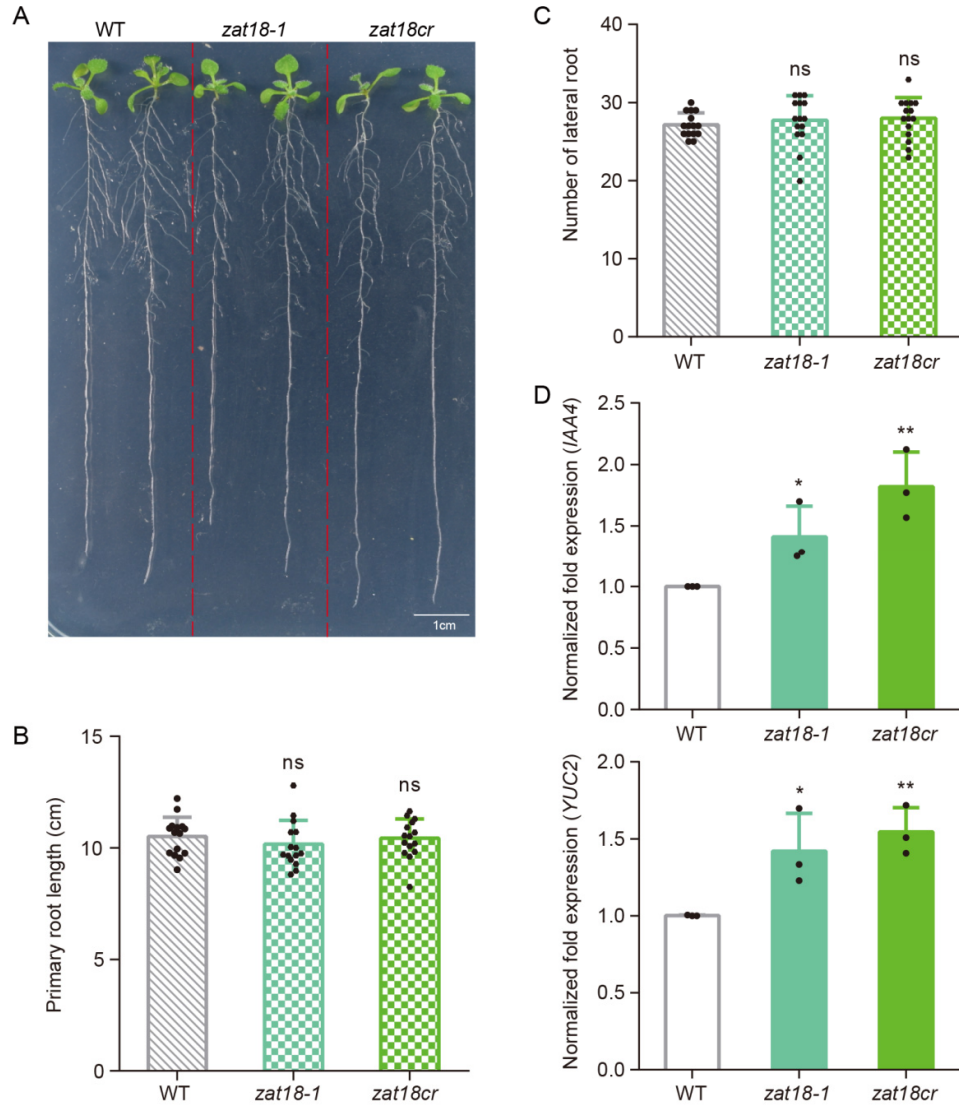

**Figure S5.** Auxin signaling is activated in *zat18* mutants with no obvious phenotype. **(A)** Representative seedlings to show root growth status of two-week-old WT and *zat18* mutant. **(B)** The primary root lengths of two-week-old WT and *zat18* mutants measured by ImageJ. Data are shown as the mean  $\pm$  s.d. ( $n = 15$ ,  $n$  indicates biological replicates). **(C)** The numbers of visible lateral roots of two-week-old WT and *zat18* mutants. Data are shown as mean  $\pm$  s.d. ( $n = 15$ ,  $n$  indicates biological replicates). **(D)** The expression levels of *IAA4* and *YUC2* in two-week-old WT and *zat18* mutant seedlings without any treatment. Data are shown as mean  $\pm$  s.d. ( $n = 3$ ,  $n$  indicates biological replicates). Significant differences were detected by Student's *t* test. \*  $p < 0.05$ ; \*\*  $p < 0.01$ ; ns, no significant difference.

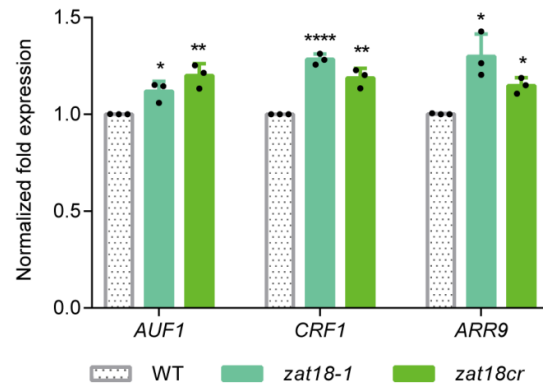

**Figure S6.** The expression levels of cytokinin activated genes in *zat18* mutants. Two-week-old WT and *zat18* mutant seedlings without any treatment were collected for RNA extraction and qRT-PCR. The expression levels of *UBQ5* served as references. Significant differences were detected by Student's *t* test. Data are shown as mean  $\pm$  s.d. ( $n = 3$ ,  $n$  indicates biological replicates). \*  $p < 0.05$ ; \*\*  $p < 0.01$ ; \*\*\*\*  $p < 0.0001$ .

**Table S1.** Sequencing metrics of the 6 RNA-seq libraries.

| Genotypes    | Sample ID       | Total reads       | Mapped Reads        | Q30(%) |
|--------------|-----------------|-------------------|---------------------|--------|
| WT           | WT-1            | 39,376,864 (100%) | 38,166,341 (96.93%) | 94.88  |
|              | WT-2            | 41,383,362 (100%) | 40,114,824 (96.93%) | 94.72  |
|              | WT-3            | 42,523,812 (100%) | 41,236,038 (96.97%) | 94.65  |
| <i>zat18</i> | <i>zat18</i> -1 | 39,180,910 (100%) | 37,939,621 (96.83%) | 94.97  |
|              | <i>zat18</i> -2 | 40,895,410 (100%) | 39,482,637 (96.55%) | 93.49  |
|              | <i>zat18</i> -3 | 39,247,270 (100%) | 37,803,206 (96.32%) | 93.09  |

**Table S2.** The primers used in this study.

| Primer Name | Sequences (5'-3')           | Description                                                      |
|-------------|-----------------------------|------------------------------------------------------------------|
| ZAT18-F     | TTTCATTTGGAGAGGACACGCTCGAGA | Primers for <i>ZAT18</i> coding sequence amplification           |
| ZAT18-R     | TGAAGAGAGACCGGTCCG          |                                                                  |
| ZAT18gRNA-F | TCCTCGCCCTTGCTCACCATCTCGAGA |                                                                  |
| ZAT18gRNA-R | TTCACAACTTCAAATCAATTTGTG    | Primers for constructing <i>ZAT18</i> genome editing vector      |
| ZAT18-qF    | ATTGTCTTGGTCAACGATCAGCTT    |                                                                  |
| ZAT18-qR    | AAACAAGCTGATCGTTGACCAAGA    |                                                                  |
| ZAT18TM-LP  | TAGGACGAGCATGATAACCGA       | qRT-PCR primers for <i>ZAT18</i>                                 |
| ZAT18TM-RP  | CAAATTCTTCCCAAAGATTAACAC    |                                                                  |
| LBb1.3      | ATCGATTGCTCGGTTATCATG       |                                                                  |
| WRKY54-qF   | TTTAAACGCAGTCACGATTCC       | Primers for identification of homozygous T-DNA insertion mutants |
| WRKY54-qR   | ATTTTGCCGATTTTCGGAAC        |                                                                  |
| WRKY70-qF   | GCACTGCTCAGAACCATGTCAA      |                                                                  |
| WRKY70-qR   | CAAGTCCTCACCTGTCTGAAGA      |                                                                  |
| ACL5-qF     | CAAGGCAACAAAGCAAGTCC        |                                                                  |
| ACL5-qR     | CTTCTTCCTTCATTGAGGTAGATAAAC |                                                                  |
| LAX2-qF     | GGCTGAATTAGAGAAAAGGGAAGA    |                                                                  |
| LAX2-qR     | GGTGACAAAAATGCCATTAGGG      |                                                                  |
| TAA1-qF     | TCCCAAAGAATCTTTACCGTGA      |                                                                  |
| YUC2-qF     | CTTCTCCCACACAAAGTAGAGT      |                                                                  |
| YUC2-qR     | CCCACTACACTCCCATCAC         |                                                                  |
| IAA4-qF     | TCCTTGTCCTTCACCAATGCC       |                                                                  |
| IAA4-qR     | CAAGATCAAATGCGGAAAGACT      |                                                                  |
| AUF1-qF     | CCGAATAATGCATTACCCGTTT      |                                                                  |
| AUF1-qR     | GGCTCAGACTTTGTACCTACTT      |                                                                  |
| CRF1-qF     | ATCCTTAGCCTCTTACAAGACG      |                                                                  |
| CRF1-qR     | TCTGACGAAATCCTAACCCGA       |                                                                  |
| ARR9-qF     | CCGAACTCAGCCTTCCACTT        |                                                                  |
| KMD1-qF     | TGGAGTGAGGCAAAGACCG         |                                                                  |
| KMD1-qR     | GCGTTATCGTAAACAATGGCAG      |                                                                  |
| KMD2-qF     | GTATGGCAGCAGAATCGCAG        |                                                                  |
| KMD2-qR     | CTTAGAAAACGCATTTGGGTCC      |                                                                  |
| KMD4-qF     | GATGTGATGATGTTTCTAAATGAC    |                                                                  |
| KMD4-qR     | TATCCAGCCAACGCCTTCC         |                                                                  |
| PAD4-qF     | GCGTTCCTTCTTTGCCTGC         |                                                                  |
| PAD4-qR     | AAGCCCATCTGTCTTCTGCC        |                                                                  |
| SARD1-qF    | GAGTCTCAGATGACGCAGC         |                                                                  |
|             | CGCCGATTAACAACACTTTCC       |                                                                  |
|             | ACCGAGGAACATCAGAGGTAC       |                                                                  |
|             | AAATTCGCAATGTCGAGTGGC       |                                                                  |
|             | CCGTAAGTTTAGAATCGGTGCG      |                                                                  |

qRT-PCR primers for *WRKY54*, *WRKY70*, *ACL5*, *LAX2*, *TAA1*, *YUC2*, *IAA4*, *AUF1*, *CRF1*, *ARR9*, *KMD1/2/4*, *PAD4*, *SARD1*, *RD26*, *PCC1*, *CPK22*, *RAV2*, *ERF018*, *MYB3R-5* and *UBQ5* of Arabidopsis.



|            |                        |  |
|------------|------------------------|--|
| SARD1-qR   | TTGATGTGGCGAGAGGAGAGC  |  |
| RD26-qF    | TGGGTCGTCATCGTCTTCTTC  |  |
| RD26-qR    | GTAACTCGGTAATCCATTGGTC |  |
| PCC1-qF    | GCAGCAGCAGTGGAGACAA    |  |
| PCC1-qR    | CGCCGCAGCAGAAGATACA    |  |
| CPK22-qF   | GACAAAAGCGGGTCAATCACT  |  |
| CPK22-qR   | GTTCCATTCCCATCAACATCAG |  |
| RAV2-qF    | TGATTGGAAAGTTCGGTCTGG  |  |
| RAV2-qR    | GCTTCACGGTGGTCACATTA   |  |
| ERF018-qF  | TTGGTTAGGCTCTTACGACAC  |  |
| ERF018-qR  | GGAGGCGTCAACGACTTTTC   |  |
| MYB3R-5-qF | TGATTCGCTTACCCAAACCTC  |  |
| MYB3R-5-qR | AGCATACTCATTGACACCGATT |  |
| UBQ5-qF    | GTAAACGTAGGTGAGTCCA    |  |
| UBQ5-qR    | GACGCTTCATCTCGTCC      |  |

## Supplementary Materials and Methods

### 1. Genomic DNA extraction

Leaves of three-week-old plants were collected to grind in liquid nitrogen before extracted by cetyltrimethyl ammonium bromide (CTAB) buffer [2% CTAB, 2% polyvinylpyrrolidone (PVP), 100 mM Tris-HCl pH 8.0, 25 mM ethylene diamine tetraacetic Acid (EDTA), 2 M NaCl]. The mixture was incubate at 65°C for 20 min and then cooled down to room temperature. The phenol/chloroform/isoamylol buffer in a ratio of 25:24:1 was added into the mixture and mixed violently before centrifuged at 12000 rpm for 15 min. Then we transferred supernatant to a clean tube, mixed it with a same volume of isopropanol, kept the mixture at -20°C for 1 hour and centrifuged it at 12000 rpm for 15 min to collect the DNA precipitate. The DNA precipitate was cleaned with 80% ethanol twice and dissolved in sterile ddH<sub>2</sub>O.

### 2. RNA extraction and qRT-PCR

As description in Materials and Methods section 4.4 of main text.

### 3. Statistical analyses

As description in Materials and Methods section 4.6 of main text.

### 4. The measurements of root length, fresh weight, cell size and cell number

As description in Materials and Methods section 4.7 of main text.
